# Supplementary material for: Wound microenvironment-responsive glucose consumption and hydrogen peroxide generation synergistic with azithromycin for diabetic wounds healing
Source: PubMed Central journal article supplement (PMC8965477; doi:10.7150/thno.64244), 2022-03-06
Supplement: thnov12p2658s1.pdf [file thnov12p2658s1.pdf]

## Supporting Information

### **Wound microenvironment-responsive glucose consumption and hydrogen peroxide generation synergistic with azithromycin for diabetic wounds healing**

Minqi Shi<sup>1,2</sup>, Zhen Du<sup>1,3\*</sup>, Yuchen Qi<sup>2</sup>, Wanlin Li<sup>2</sup>, Huiqun Hu<sup>5</sup>, Xiuhui Lin<sup>5</sup>, Shoujie Wang<sup>1,\*</sup>, Zhe Tang<sup>1,\*</sup> and Min Zhou<sup>1,2,4,\*</sup>

<sup>1</sup> Department of Surgery, The Fourth Affiliated Hospital, Zhejiang University School of Medicine, Yiwu 322000, China.

<sup>2</sup> Institute of Translational Medicine, Zhejiang University, Hangzhou 310009, China.

<sup>3</sup> The Cancer Hospital of the University of Chinese Academy of Sciences (Zhejiang Cancer Hospital), Institute of Basic Medicine and Cancer (IBMC), Chinese Academy of Sciences, Hangzhou, Zhejiang 310022, China

<sup>4</sup> State Key Laboratory of Modern Optical Instrumentations, Zhejiang University, Hangzhou 310058, China.

<sup>5</sup> Department of Infectious Diseases, The Second Affiliated Hospital, Zhejiang University School of Medicine, Hangzhou 310009, China.

\* Corresponding authors.

E-mail: zhoum@zju.edu.cn (MZ)

8xi@zju.edu.cn (Z.T)

duzhen90@zju.edu.cn (Z.D)

wangshoujie@zju.edu.cn (S.W)

## Supplementary Table

**Table S1.** The kinetic parameters of the different samples using glucose as substrate.

|              | $K_m$ (mM) | $K_{cat}$ (s <sup>-1</sup> ) | $K_{cat}/K_m$ (s <sup>-1</sup> mM <sup>-1</sup> ) |
|--------------|------------|------------------------------|---------------------------------------------------|
| GOX-HMSN     | 39.64±3.17 | 499.23±20.89                 | 12.67±0.73                                        |
| GOX-HMSN-AZM | 41.70±5.76 | 513.62±43.19                 | 12.41±0.80                                        |

## Supplementary Figures

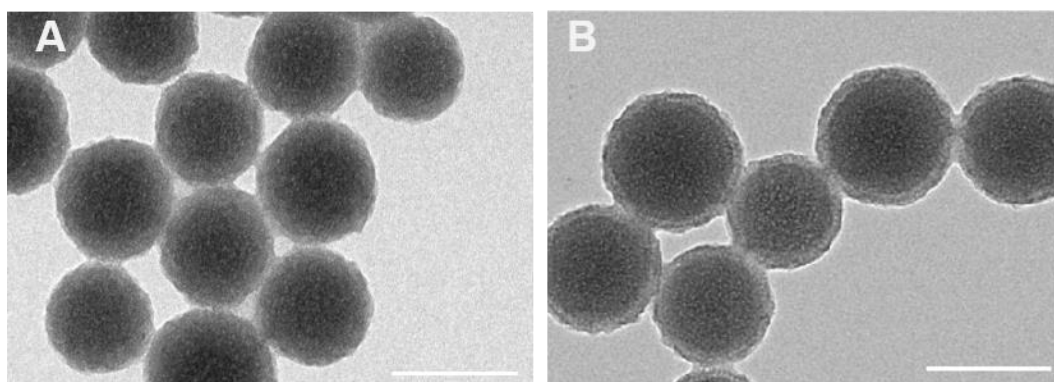

**Figure S1.** (A) TEM image of dSiO<sub>2</sub>. (B) TEM image of dSiO<sub>2</sub>@MSN. Scale bar = 100 nm.

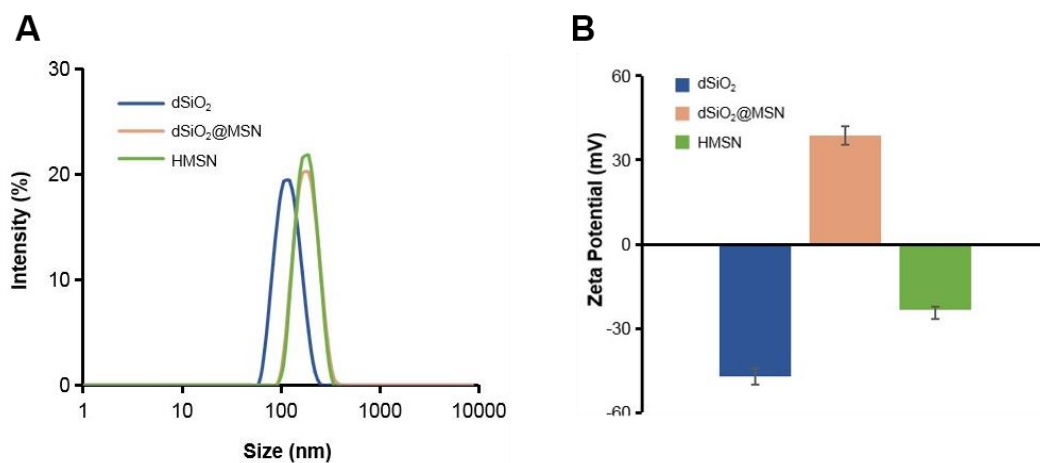

**Figure S2.** (A) Hydrodynamic diameters of dSiO<sub>2</sub>, dSiO<sub>2</sub>@MSN and HMSN, respectively. (B) Zeta potential of dSiO<sub>2</sub>, dSiO<sub>2</sub>@MSN and HMSN, respectively.

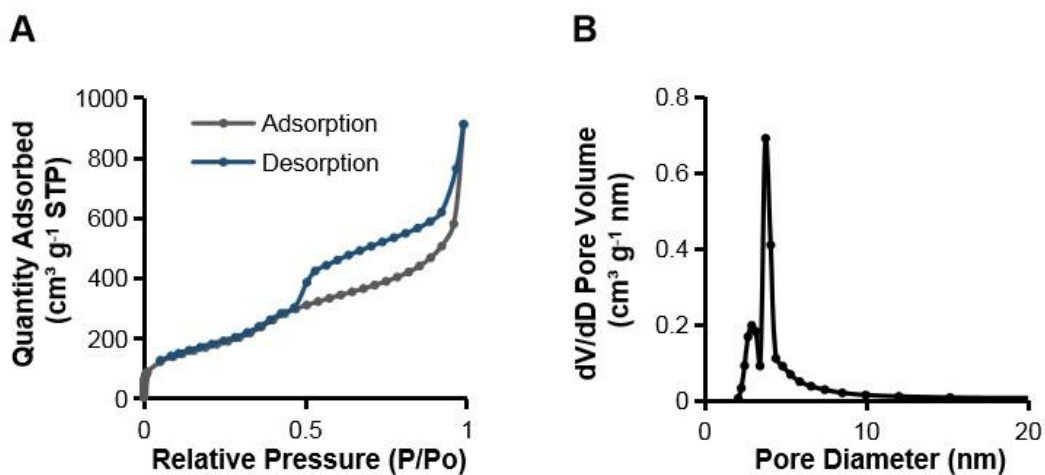

**Figure S3.** (A) The nitrogen adsorption-desorption isotherm of HMSN. (B) Corresponding pore size distribution of HMSN.

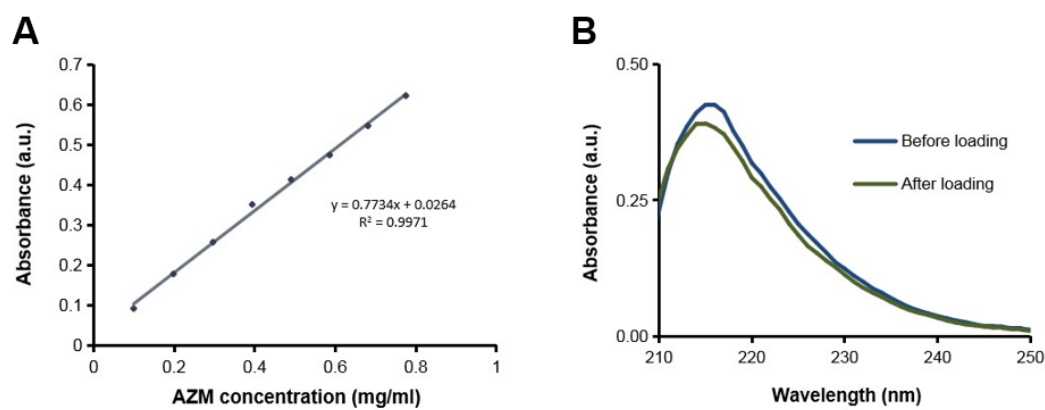

**Figure S4.** (A) UV-vis absorption standard curve of AZM at 215 nm. (B) UV-vis absorption spectra of the supernatant before and after azithromycin loading to HMSN.

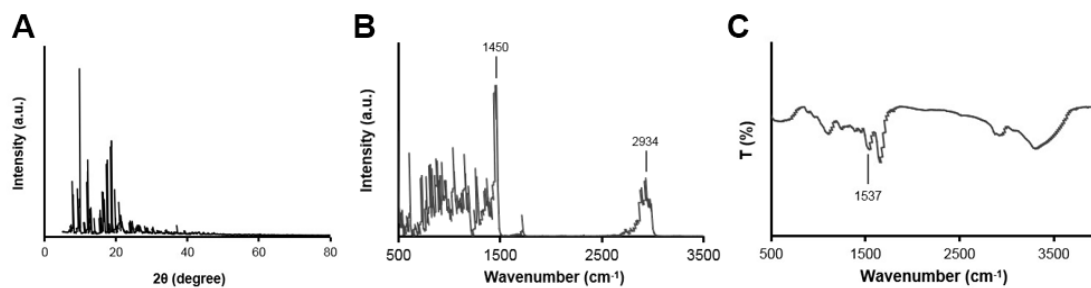

**Figure S5.** (A) Typical XRD patterns of azithromycin. (B) Raman spectra of azithromycin. (C) FTIR spectra of glucose oxidase (GOX).

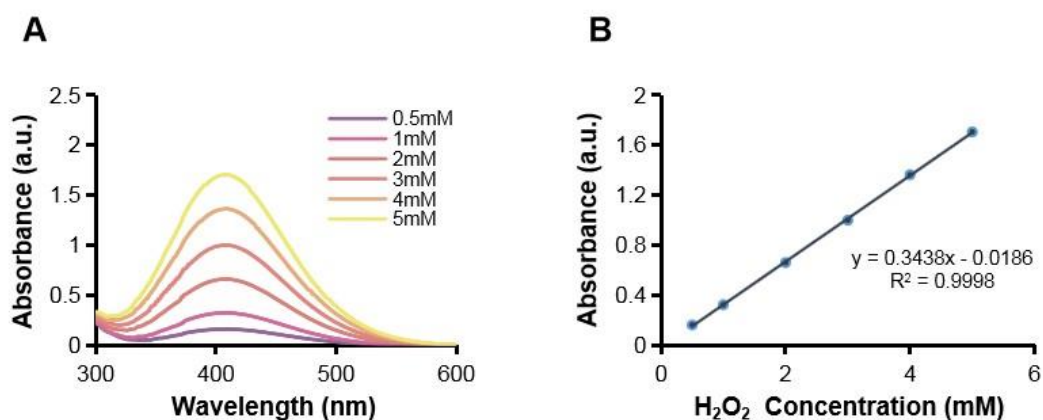

**Figure S6.** (A) The UV-vis spectra of different concentrations of H<sub>2</sub>O<sub>2</sub> using titanium sulfate colorimetric method. (B) The corresponding UV-vis absorption standard curve of H<sub>2</sub>O<sub>2</sub> at 405 nm.

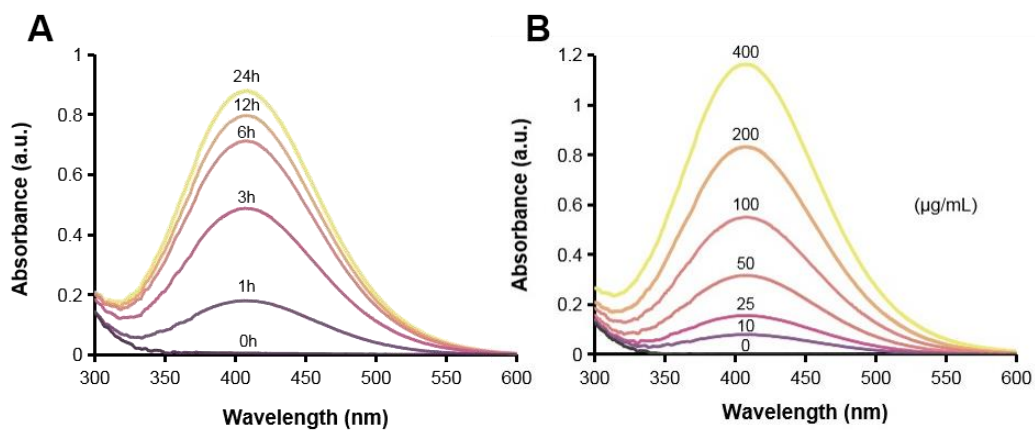

**Figure S7.** (A) Under the amount of 200 µg/mL GOX-HMSN-AZM, the UV-vis spectra of the generated  $H_2O_2$  concentration on different reaction times by titanium sulfate colorimetric method. (B) The UV-vis spectra of the generated  $H_2O_2$  concentration catalyzed by different concentrations of GOX-HMSN-AZM at 12 h using titanium sulfate colorimetric method.

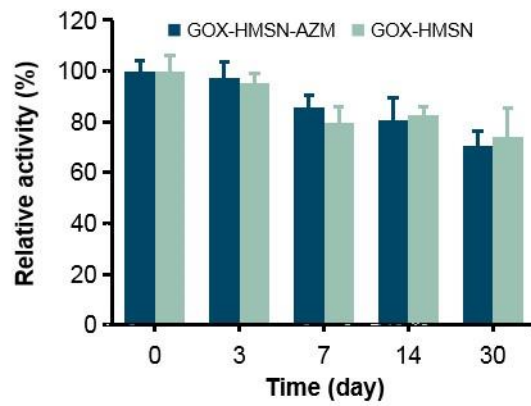

**Figure S8.** The relative enzymatic activity of GOX-HMSN-AZM and GOX-HMSN stored at 4 °C after 0, 3, 7, 14, and 30 days.

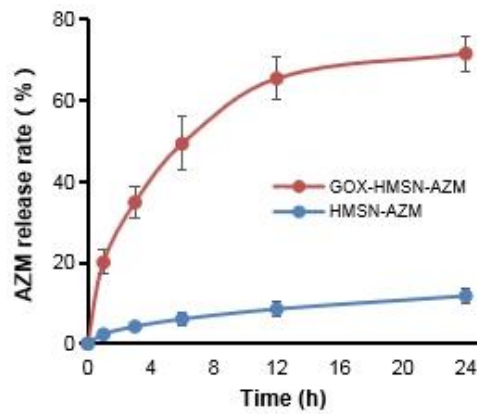

**Figure S9.** Quantitative analysis of the released azithromycin from HMSN-AZM and GOX-HMSN-AZM.

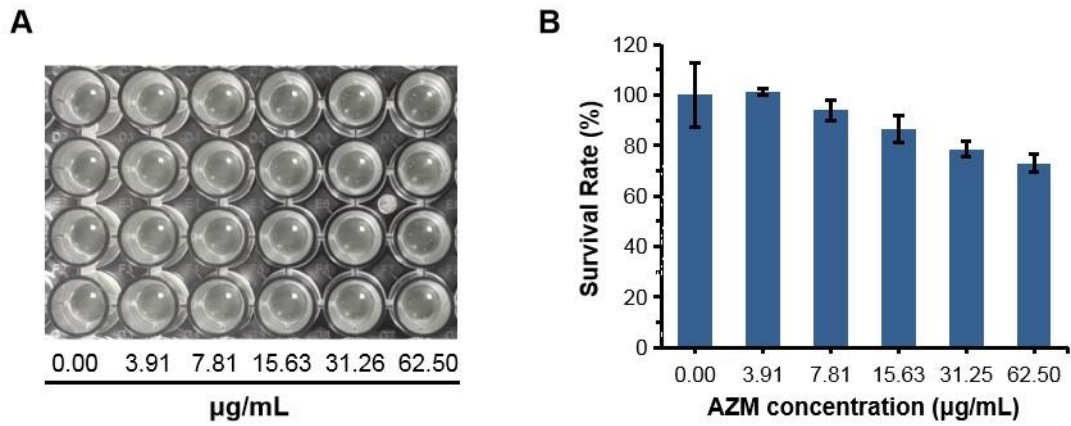

**Figure S10.** (A) Planktonic cultivation turbidity (*S. aureus*) with 0, 3.91, 7.81, 15.63, 31.25, and 62.50  $\mu\text{g/mL}$  of AZM after standard incubation for 24 h. (B) The corresponding survival rate of *S. aureus* incubated with different concentrations of AZM after 24 h.

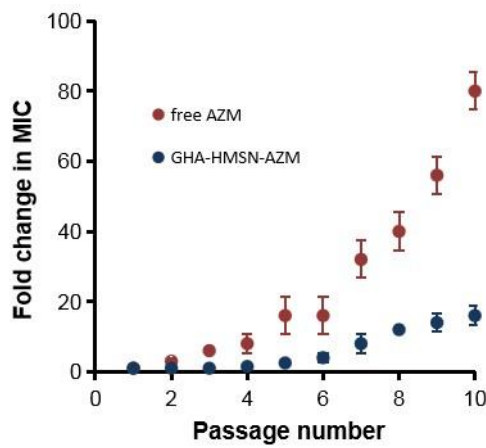

**Figure S11.** Resistance development of *S. aureus* after continuous exposure toward free AZM or GOX-HMSN-AZM for 10 passages.



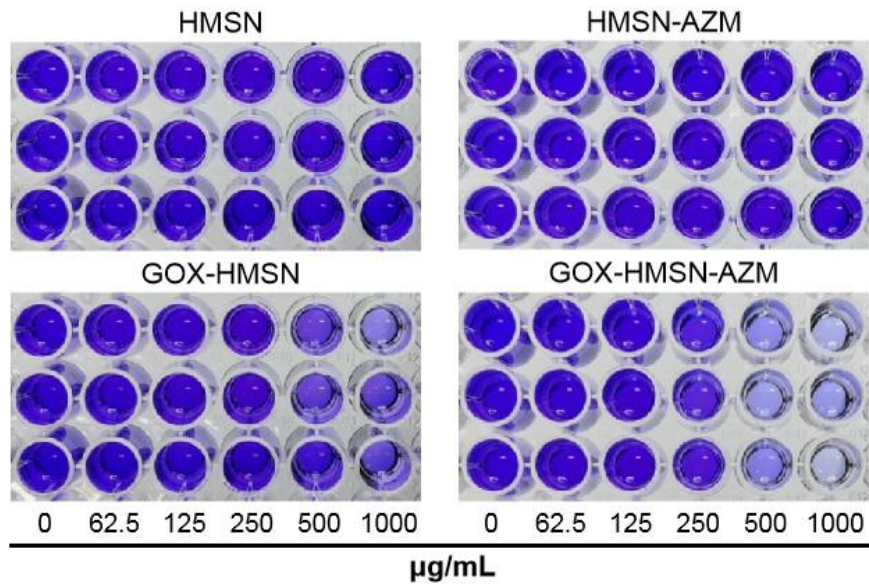

**Figure S12.** The images of crystal violet staining assay. The optical densities of the wells represent biofilm mass residuals.

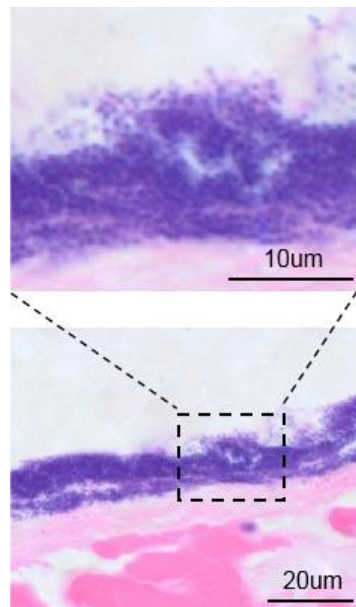

**Figure S13.** Micrographs of H&E staining of the db/db mice dermal wound tissue after inoculation with *S. aureus*.

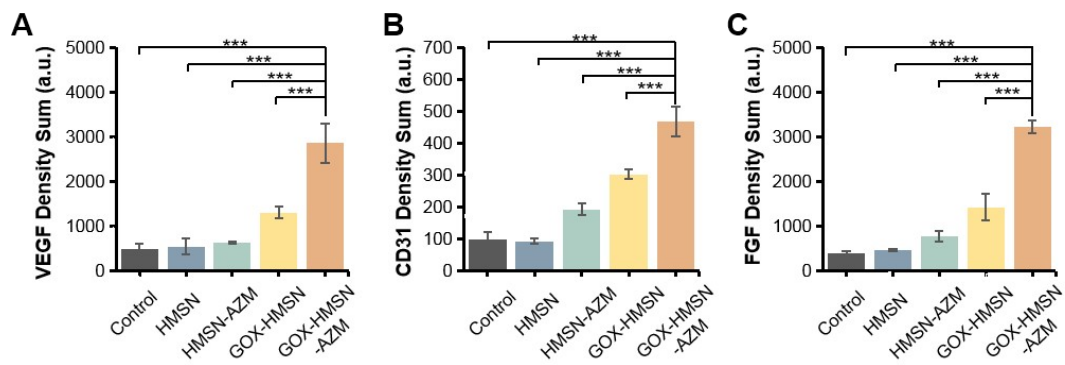

**Figure S14.** Corresponding quantitative analysis of VEGF, CD31 and FGF in immunohistochemical assay. (\* $p < 0.05$ , \*\* $p < 0.01$ , \*\*\* $p < 0.001$ ).

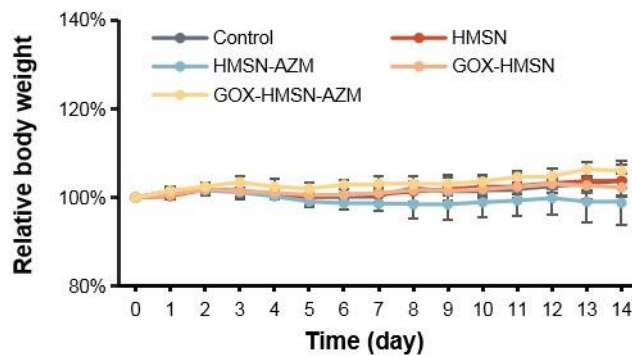

**Figure S15. Weight change curves of mice after different treatments.** There were negligible changes during 14 days, indicating the relatively high safety of these treatments.
